# Supplementary material for: Hierarchical CoMoS3.13/MoS2hollow nanosheet arrays as bifunctional electrocatalysts for overall water splitting
Source: Royal Society of Chemistry journal article supplement (doi:10.1039/d2dt02312a), 2022-01-01
Supplement: d2dt02312a1.pdf [file d2dt02312a1.pdf]

**Supporting Information**

**Hierarchical CoMoS<sub>3.13</sub>/MoS<sub>2</sub> Hollow Nanosheet Arrays as  
Bifunctional Electrocatalysts for Overall Water Splitting**

Chunhong Qu, Jian Cao\*, Yanli Chen, Maobin Wei, Xiaoyan Liu, Bo Feng, Shuting Jin, Ao Xu, Doudou Jin, Lili Yang\*

<sup>a</sup>College of Physics, Jilin Normal University, Changchun 130103, PR China

<sup>b</sup>National Demonstration Center for Experimental Physics Education, Jilin Normal University, Siping 136000, PR China

<sup>c</sup>Key Laboratory of Preparation and Application of Environmental Friendly Materials Ministry of Education, Jilin Normal University, Changchun, 130103, PR China

Corresponding author E-mail: [caojian\\_928@163.com](mailto:caojian_928@163.com), [llyang1980@126.com](mailto:llyang1980@126.com), Phone: +86 434 3290009, Fax: +86 434 3294566

## **1. Preparation of ZIF-67/CC:**

Prior to the preparation, the carbon cloth (20 mm × 30 mm) was washed through sonication in 3.0 M HCl, acetone and deionized water several times to remove surface impurities, followed by drying at 60 °C for 6 h under vacuum.

0.582 g of  $\text{Co}(\text{NO}_3)_2 \cdot 6\text{H}_2\text{O}$  and 1.314 g of 2-methylimidazole were dissolved in 40 ml of deionized water under magnetically stirring for 1 h. A cleaned carbon cloth (20 mm × 30 mm) was immersed in the mixed solution for 4 h at room temperature to obtain the purple ZIF-67/CC, which was washed 3 times with deionized water and ethanol, and dried at 60 °C for 6 h.

## 2. Supplementary Results

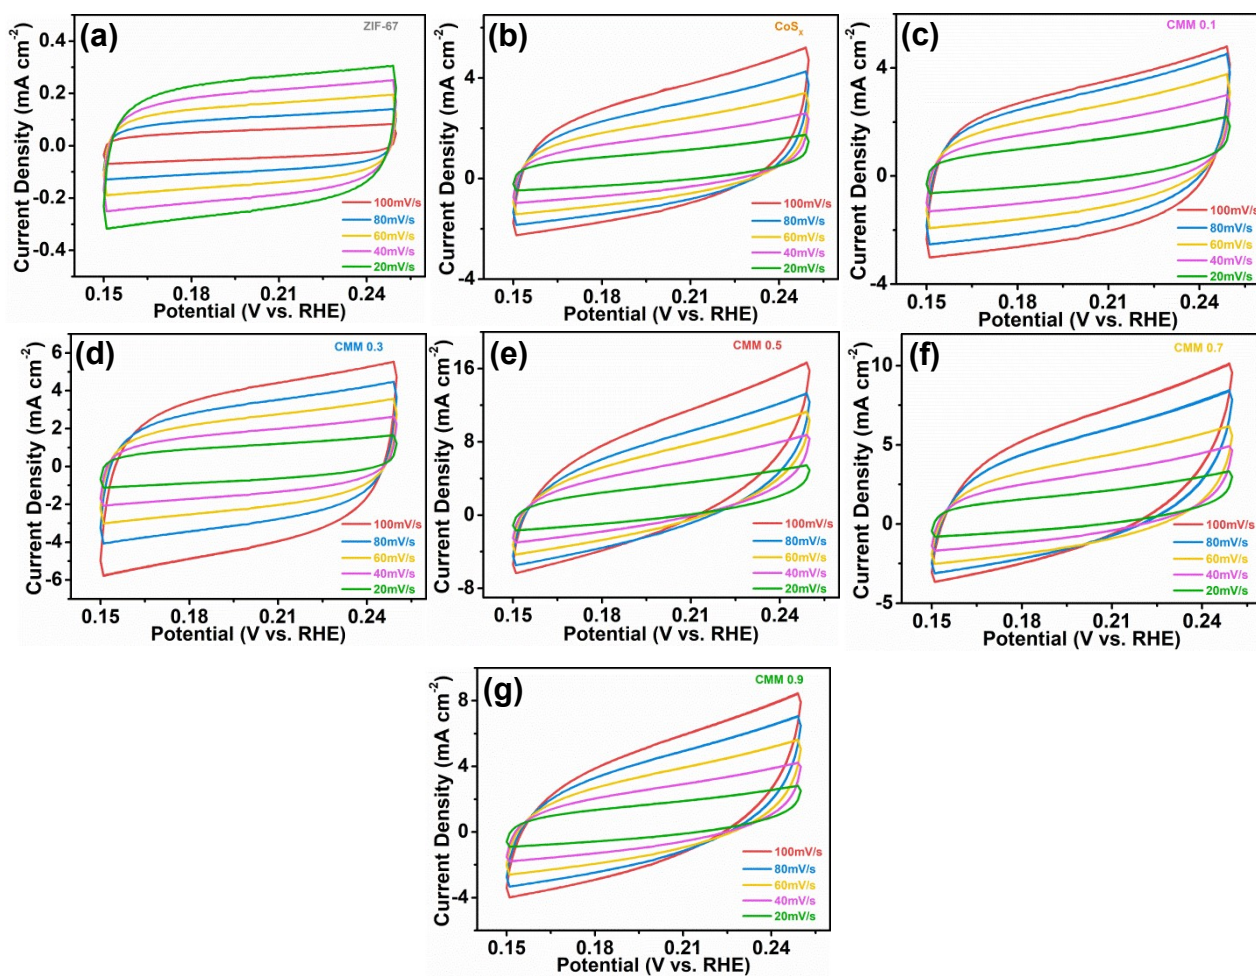

Fig. S1 Cyclic voltammetry of (a-g) ZIF-67, CoS<sub>x</sub>, CMM 0.1, CMM 0.3, CMM 0.5, CMM 0.7 and CMM 0.9 in 1 M KOH at various scan rates of 20, 40, 60, 80, 100 mV s<sup>-1</sup>.

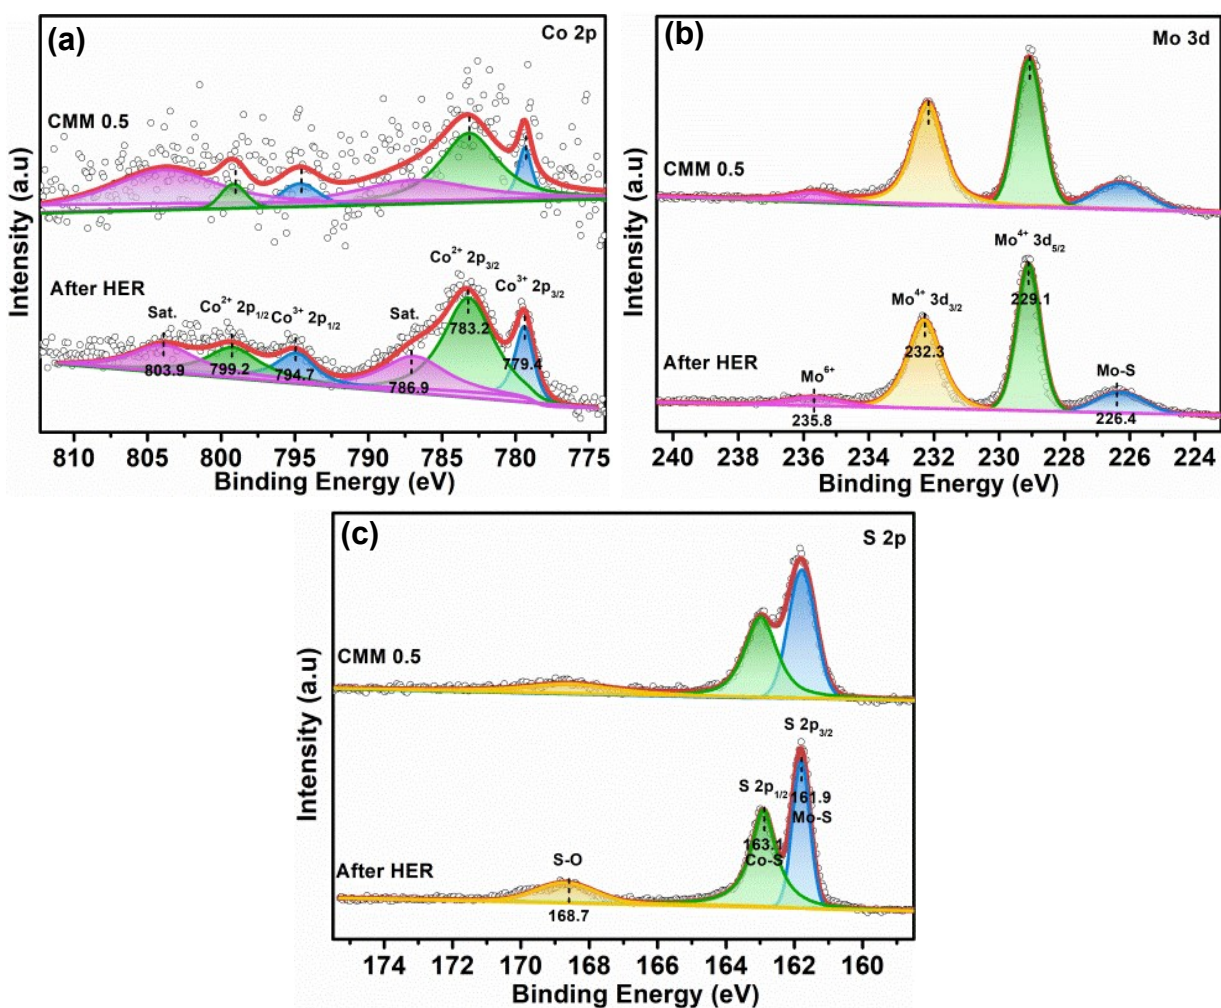

Fig. S2 (a-c) Co 2p、Mo 3d and S 2p high resolution XPS spectra of CMM 0.5 after HER test.

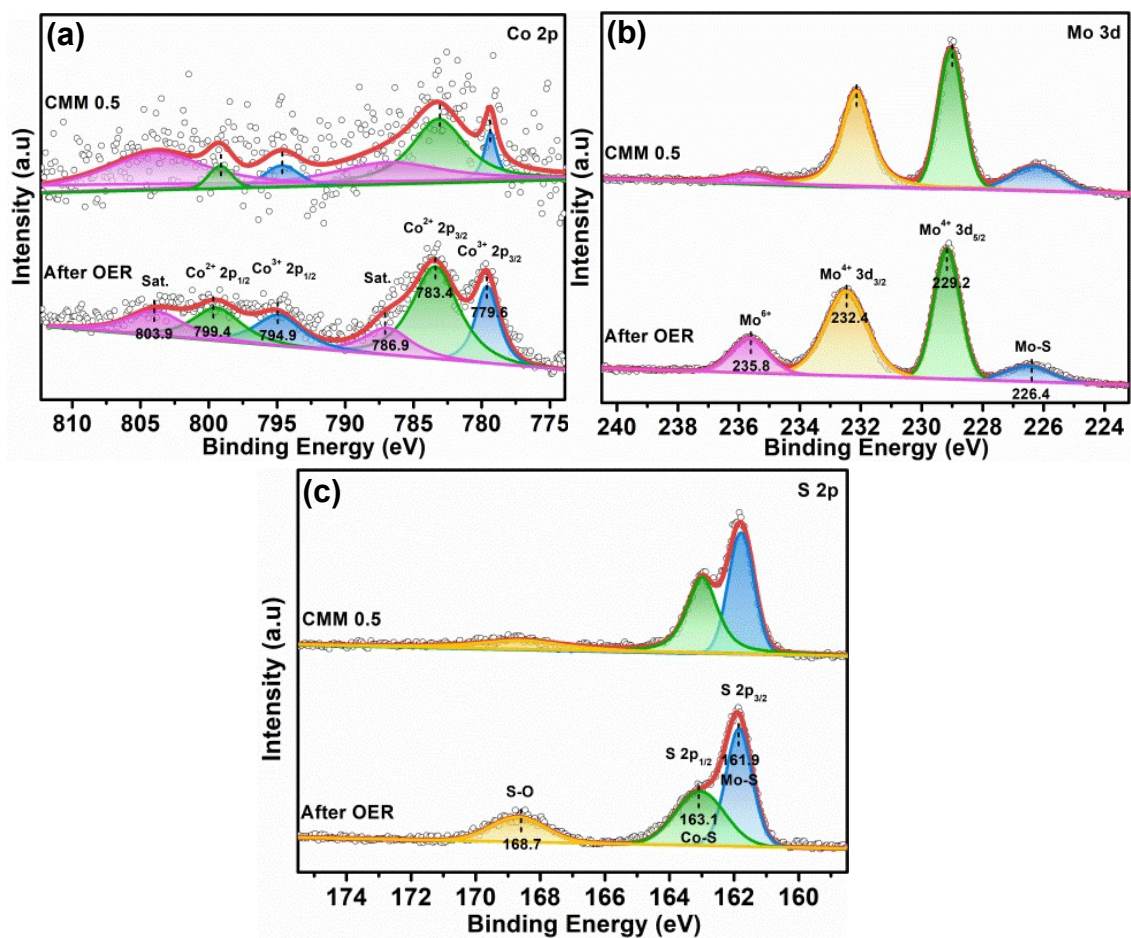

Fig. S3 (a-c) Co 2p、Mo 3d and S 2p high resolution XPS spectra of CMM 0.5 after OER test

Table S1 Comparison of HER performance of CMM 0.5 with reported

| electrolyte | catalyst                                                               | overpotential<br>(mV) | current density<br>(mA cm <sup>-2</sup> ) | tafel slope<br>(mV dec <sup>-1</sup> ) | ref          |
|-------------|------------------------------------------------------------------------|-----------------------|-------------------------------------------|----------------------------------------|--------------|
| 1 M KOH     | Co <sub>9</sub> S <sub>8</sub> @MoS <sub>2</sub>                       | 239                   | 10                                        | 84                                     | 5            |
| 1 M KOH     | S-Co <sub>9</sub> S <sub>8</sub> @<br>MoS <sub>2</sub> /CNFs           | 122                   | 10                                        | 66                                     | 7            |
| 1 M KOH     | CoS/MoS <sub>2</sub>                                                   | 180                   | 10                                        | 72                                     | 9            |
| 1 M KOH     | MoO <sub>2</sub> @MoS <sub>2</sub> @<br>Co <sub>9</sub> S <sub>8</sub> | 160                   | 10                                        | 80                                     | 2            |
| 1 M KOH     | CoMoS <sub>4</sub> /NF                                                 | 143                   | 10                                        | 54.3                                   | 13           |
| 1 M KOH     | CoMoS <sub>4</sub> -12                                                 | 141                   | 10                                        | 60.1                                   | 14           |
| 1 M KOH     | Co <sub>3</sub> S <sub>4</sub> /MoS <sub>2</sub><br>NRs                | 116                   | 10                                        | 59                                     | 15           |
| 1 M KOH     | CMM 0.5                                                                | 107                   | 10                                        | 95.7                                   | This<br>work |

electrocatalysts

Table S2 Comparison of OER performance of CMM 0.5 with reported

| electrolyte | catalyst                                           | overpotential<br>(mV) | current density<br>(mA cm <sup>-2</sup> ) | tafel slope<br>(mV dec <sup>-1</sup> ) | ref          |
|-------------|----------------------------------------------------|-----------------------|-------------------------------------------|----------------------------------------|--------------|
| 1 M KOH     | Co <sub>9</sub> S <sub>8</sub> @MoS <sub>2</sub>   | 230                   | 10                                        | 66                                     | 5            |
| 1 M KOH     | CoMo-MI-600                                        | 316                   | 10                                        | 89.9                                   | 6            |
| 1 M KOH     | NCN-CoMoS                                          | 233                   | 10                                        | 56.3                                   | 3            |
| 1 M KOH     | Co <sub>3</sub> S <sub>4</sub> @FN-Co <sub>3</sub> | 250                   | 10                                        | 78                                     | 4            |
| 1 M KOH     | Co/MoC@N-C                                         | 290                   | 10                                        | 90                                     | 8            |
| 1 M KOH     | CoS/MoS <sub>2</sub>                               | 281                   | 10                                        | 79                                     | 9            |
| 1 M KOH     | CoS <sub>2</sub> -MoS <sub>2</sub><br>HNAs/Ti      | 266                   | 10                                        | 104                                    | 10           |
| 1 M KOH     | Co <sub>1.5</sub> Mo <sub>1.0</sub> S/o-<br>MWNTs  | 311                   | 10                                        | 70                                     | 11           |
| 1 M KOH     | Ru-CoMo/CFP                                        | 237                   | 10                                        | 79                                     | 12           |
| 1 M KOH     | CoMoS <sub>4</sub> /NF                             | 256                   | 10                                        | 68.5                                   | 13           |
| 1 M KOH     | CoMoS <sub>4</sub> -12                             | 250                   | 10                                        | 51.9                                   | 14           |
| 1 M KOH     | Co <sub>3</sub> S <sub>4</sub> /MoS <sub>2</sub>   | 280                   | 10                                        | 52                                     | 15           |
| 1 M KOH     | CMM 0.5                                            | 169                   | 10                                        | 86                                     | This<br>work |

electrocatalysts

Table S3 Comparison of overall water splitting performance of CMM 0.5 with reported materials

| electrolyte | catalyst                                                                                                  | cell voltage<br>(V) | current density<br>(mA cm <sup>-2</sup> ) | ref       |
|-------------|-----------------------------------------------------------------------------------------------------------|---------------------|-------------------------------------------|-----------|
| 1 M KOH     | Co <sub>3</sub> O <sub>4</sub> @Mo-Co <sub>3</sub> S <sub>4</sub> -<br>Ni <sub>3</sub> S <sub>2</sub> /NF | 1.62                | 10                                        | 1         |
| 1 M KOH     | CoS/MoS <sub>2</sub>                                                                                      | 1.61                | 10                                        | 9         |
| 1 M KOH     | MoO <sub>2</sub> @MoS <sub>2</sub> @Co <sub>9</sub> S <sub>8</sub>                                        | 1.62                | 10                                        | 2         |
| 1 M KOH     | CoS <sub>2</sub> -MoS <sub>2</sub> HNAs/Ti                                                                | 1.56                | 10                                        | 10        |
| 1 M KOH     | Co <sub>1.5</sub> Mo <sub>1.0</sub> S/o-MWNTs                                                             | 1.60                | 10                                        | 11        |
| 1 M KOH     | Ru-CoMo/CFP                                                                                               | 1.54                | 10                                        | 12        |
| 1 M KOH     | CoMoS <sub>4</sub> /NF                                                                                    | 1.65                | 10                                        | 13        |
| 1 M KOH     | CoMoS <sub>4</sub>                                                                                        | 1.51                | 10                                        | 14        |
| 1 M KOH     | Co <sub>3</sub> S <sub>4</sub> /MoS <sub>2</sub> NRs                                                      | 1.66                | 20                                        | 15        |
| 1 M KOH     | CMM 0.5                                                                                                   | 1.507               | 10                                        | This work |



## References

- 1 Q. Wu, A. Dong, C. Yang, L. Ye, L. Zhao, Q. Jiang, *Chemical Engineering Journal*, 2021, **413**, 127482.
- 2 Y. Li, C. Wang, M. Cui, J. Xiong, L. Mi, S. Chen, *Applied Surface Science*, 2021, **543**, 148804.
- 3 M. Kim, H. Seok, N. Clament Sagaya Selvam, J. Cho, G. H. Choi, M. G. Nam, S. Kang, T. Kim, P. J. Yoo, *Journal of Power Sources*, 2021, **493**, 229688.
- 4 X. Zhu, J. Dai, L. Li, D. Zhao, Z. Wu, Z. Tang, L. J. Ma, S. Chen, *Carbon*, 2020, **160**, 133-144.
- 5 L. He, S. Huang, Y. Liu, M. Wang, B. Cui, S. Wu, J. Liu, Z. Zhang, M. Du, *Journal of Colloid and Interface Science*, 2021, **586**, 538-550.
- 6 Y. Guo, Q. Huang, J. Ding, L. Zhong, T. T. Li, J. Pan, Y. Hu, J. Qian, S. Huang, *International Journal of Hydrogen Energy*, 2021, **46**, 22268-22276.
- 7 J. Hao, H. Hu, Y. Dong, J. Hu, X. Sang, F. Duan, S. Lu, H. Zhu, M. Du, *New Journal of Chemistry*, 2021, **45**, 11167-11173.
- 8 H. Huang, L. Kong, M. Liu, J. He, W. Shuang, Y. Xu, X. H. Bu, *Journal of Energy Chemistry*, 2021, **59**, 538-546.
- 9 W. H. Huang, X. M. Li, X. F. Yang, H. B. Zhang, F. Wang, J. Zhang, *Chem Commun (Camb)*, 2021, **57**, 4847-4850.
- 10 Y. Li, W. Wang, B. Huang, Z. Mao, R. Wang, B. He, Y. Gong, H. Wang, *Journal of Energy Chemistry*, 2021, **57**, 99-108.
- 11 Y. Li, L. Ji, X. Zhou, T. Li, X. Chen, X. Zhang, F. Yang, *ChemCatChem*, 2021, **13**, 3270-3274.
- 12 Y. Lin, D. Zhang, Y. Gong, *Applied Surface Science*, 2021, **541**, 148518.
- 13 A. A. Yadav, Y. M. Hunge, S. W. Kang, *Surfaces and Interfaces*, 2021, **23**, 101020.
- 14 A. A. Yadav, Y. M. Hunge, S. W. Kang, *Ultrason Sonochem*, 2021, **72**, 105454.
- 15 Z. Li, W. Xu, X. Yu, S. Yang, Y. Zhou, K. Zhou, Q. Wu, S. Ning, M. Luo, D. Zhao, N. Wang, *Inorganic Chemistry Frontiers*, 2022, **9**, 2139-2149.
